# Supplementary material for: Transcription Factors That Regulate the Pathogenesis of Ulcerative Colitis
Source: Biomed Res Int. 2020 Aug 24;2020:7402657. doi: 10.1155/2020/7402657 (PMC7468618; doi:10.1155/2020/7402657)
Supplement: Supplementary 3 — . Supplementary Table S3: DEGs were significantly enriched in the target genes. [file 7402657.f3.xlsx]

## Sheet: Supplementary Table x
Table S2. The enrichment table for the DETFs
ID	Description	GeneRatio	BgRatio	pvalue	p.adjust	qvalue	geneID	Count
KLF2	KLF2	17/1440	98/20640	0.00041166	0.00041166	0.000866654	MFSD2A/SLC2A3/SIX1/FOS/TEX14/SOCS3/PGS1/JUNB/KLF2/SNAI1/BMP7/SOX18/RRP1B/BHLHE40/CD83/JARID2/S1PR3	17
IKZF1	IKZF1	31/2942	141/20640	0.00835717	0.00835717	0.027932	RUNX3/GPX7/ARHGAP30/ATP2B4/ZCCHC24/ENO2/PTPN6/MEGF11/TRPV2/HCN2/POU2F2/PTGIR/KCNC3/SIGLEC6/CACNG8/SLC1A4/LCT/GRM2/ARHGEF3/ADAMTS9/PDGFRB/AIF1/NFKBIE/RAB23/LCA5/CCR6/PRKAR2B/IRF5/CALD1/RIPK2/WNK3	31
HOXA2	HOXA2	4/590	35/20640	0.0171585	0.0171585	0.0622586	RSBN1/TSHZ1/HOXA1/FREM1	4
HLF	HLF	20/823	298/20640	0.0166185	0.0166185	0.0244905	CLIC4/ZFYVE9/ANGPTL1/PPL/AKTIP/NR1D1/MPP2/PCSK2/FOXP1/PFN2/PDE4D/PIK3R1/SSBP2/SLIT3/KLHL7/RNF38/KLF9/DMD/ZNF711/TCEAL7	20
CBFA2T3	CBFA2T3	53/2434	264/20640	6.88791e-05	6.88791e-05	0.000338354	COL9A2/TACSTD2/SGIP1/S100A9/CRTC2/ARHGEF2/LY9/BATF3/HLX/LMO2/TMEM109/CD6/MMP13/CADM1/CBL/FLI1/SLC2A3/CD69/KRT73/HOXC4/IL23A/STAT2/RILPL1/COL4A1/COL4A2/GZMB/PGF/BATF/WDR81/RAB34/PITPNC1/HMHA1/PTPRS/ARHGAP15/CYTIP/CD28/RASSF2/SLA2/RUNX1/ERG/C1QTNF6/GRAP2/TMEM158/NFKBIZ/TIGIT/TP63/FDCSP/IL13/TAGAP/FKBP14/ENPP2/FOXP3/SASH3	53
BACH2	BACH2	46/2508	255/20640	0.00384148	0.00384148	0.0141528	HIVEP3/SGIP1/KCNA2/PEA15/SLC41A1/SLC26A9/AKT3/FADS3/EML3/RAB30/MMP7/ENO2/SPATS2/MMP19/BTBD11/HSPB8/DCLK1/PCDH17/CHST4/DLG4/FGF11/HS3ST3B1/RAB34/DUSP14/CSF3/KRT16/STAT5B/GNGT2/ABI3/PPP1R9B/SLC16A6/COL5A3/S1PR2/IL11/DYSF/LINC00152/MMP9/UCN2/COL7A1/KBTBD8/CLDN16/RNF144B/PRDM1/SCRN1/ZCWPW1/CAPN6	46
NFE2	NFE2	53/2162	333/20640	0.00131735	0.00131735	0.00554674	FBXO44/PADI4/FHL3/NRD1/KCNA2/RAB13/PEA15/SGMS1/ANKRD22/BNIP3/PSMA1/CD44/CLSTN3/SPATS2/XPOT/MDM2/PSMA3/TRAF3/MAP2K1/ST3GAL2/HS3ST3B1/BLMH/OMG/PPP1R9B/ICAM2/SLC16A6/ANGPTL4/COL5A3/ZBTB32/LINC00152/IL18RAP/SLC11A1/CST7/MMP9/BACH1/KBTBD8/HCLS1/SEL1L3/SEC24D/E2F3/MDFI/BAG2/AKIRIN2/PRDM1/IL6/SNX10/LIMK1/TBXAS1/RBPMS/NUDCD1/ASS1/BTK/HS6ST2	53
EGR2	EGR2	28/1879	188/20640	0.00648693	0.00648693	0.0121393	FASLG/ZNF281/PTPN7/UBASH3B/KCNH3/PLXNC1/GPR132/BCL2A1/CX3CL1/NFATC3/MAP3K3/SEC14L1/CA11/RUNX1/ITPR1/CSRNP1/GNAI2/BCL6/EGR1/PDGFRB/PRR3/KCNQ5/PCOLCE/COL26A1/EGR3/ZHX2/PTGES/CD40LG	28
XBP1	XBP1	34/2829	131/20640	0.000138117	0.000138117	0.000458737	TRIM46/PRRX1/IL10/DENND5A/SRPR/RBP5/CLSTN3/RHEBL1/MMP14/BCL11B/STAT3/SRP68/PLEKHF1/TRIB2/ARFGAP3/MANF/DUSP7/SEC61A1/USO1/SEC24D/JADE1/RAB24/E2F3/PIM1/FKBP14/GARS/SND1/PDIA4/PRDX4/GLA/ARMCX3/ARMCX2/MORF4L2/APLN	34
ETV7	ETV7	35/1957	227/20640	0.00278318	0.00278318	0.00520828	SLC30A7/INTS3/ADAMTS4/CD247/WDFY4/SEC24C/DPCD/SYVN1/SIPA1/CD3E/PTPN6/CLEC4D/IL23A/AGAP2/HSP90B1/LCP1/FAM65A/FCHO1/RINL/STAT4/CASP8/HM13/TGIF2/LIME1/HCLS1/RAB43/DAPP1/CLINT1/RGS14/STX11/PSMC2/LYN/E2F5/TFE3/ARHGAP4	35
